# Supplementary material for: Toll-Like Receptor 2 Attenuates the Formation and Progression of Angiotensin II-Induced Abdominal Aortic Aneurysm in ApoE−/− Mice
Source: PubMed Central journal article supplement — J Vasc Res. 2024 Oct 28;61(6):304–17. doi: 10.1159/000541651 (PMC11651225; doi:10.1159/000541651), 2024-10-28
Supplement: Supplementary_material-Suppl.1-s1.pdf [file Supplementary_material-Suppl.1-s1.pdf]

## Supplemental Material

### Supplemental Table I

**Crosstabulation Table used for Statistical Analysis of Aneurysm Severity by Treatment**

| Genotype       | Aneurysm Type |        |         |          |         |    | total |
|----------------|---------------|--------|---------|----------|---------|----|-------|
|                | none          | Type I | Type II | Type III | Type IV |    |       |
| ApoE-/-TLR2+/+ | Count         | 16     | 3       | 7        | 21      | 7  | 54    |
|                | %             | 30     | 5       | 13       | 39      | 13 | 100   |
| ApoE-/-TLR2-/- | Count         | 6      | 6       | 12       | 8       | 20 | 52    |
|                | %             | 12     | 12      | 23       | 15      | 38 | 100   |

| Treatment      | Aneurysm Type |        |         |          |         |    | total |
|----------------|---------------|--------|---------|----------|---------|----|-------|
|                | none          | Type I | Type II | Type III | Type IV |    |       |
| AngII+Placebo  | Count         | 7      | 2       | 4        | 10      | 3  | 26    |
|                | %             | 27     | 8       | 15       | 38      | 12 | 100   |
| AngII+Pam3CSK4 | Count         | 17     | 2       | 3        | 2       | 2  | 26    |
|                | %             | 65     | 8       | 11       | 8       | 8  | 100   |

## Supplemental Table II

**Systolic blood pressure, total cholesterol and body weight in ApoE<sup>-/-</sup> mice treated with AngII, and AngII+Pam3CSK4, and in AngII treated ApoE<sup>-/-</sup>-TLR2<sup>-/-</sup> mice**

|                              | ApoE <sup>-/-</sup> |                 |                          | ApoE <sup>-/-</sup> -TLR2 <sup>-/-</sup> |                 |
|------------------------------|---------------------|-----------------|--------------------------|------------------------------------------|-----------------|
|                              | Control<br>(n=10)   | AngII<br>(n=10) | AngII+Pam3CSK4<br>(n=10) | Control<br>(n=10)                        | AngII<br>(n=10) |
| SBP (mmHg)                   | 102±3               | 152±7*          | 151±9*                   | 110±6                                    | 164±10*         |
| Total cholesterol<br>(mg/dL) | 322±37              | 369±49          | 267±30                   | 315±23                                   | 302±35          |
| Body weight (g)              | 29.8±0.7            | 30.2±1.5        | 29.8±1.0                 | 29.5±1.4                                 | 30.3±0.7        |

SBP was measured using a tail-cuff system. Total cholesterol and body weight were determined at the end of the study. All results are expressed as mean±SEM. \**P*<0.05 compared with control.

### Supplemental Table III

qRT-PCR array for chemokines & chemokine receptors in suprarenal aorta from ApoE<sup>-/-</sup> mice treated with vehicle, AngII, Pam3CSK4 alone, or Pam3CSK4+AngII

|                 | AngII |       |        | Pam3   | Pam3+AngII |
|-----------------|-------|-------|--------|--------|------------|
|                 | day 3 | day 7 | day 28 | day 28 | day 28     |
| <b>Aneurysm</b> | 0 %   | 14%   | 70%    | 0%     | 35%        |
| CCL5/ Rantes    | 1.1   | 1.9   | 7.1    | 12.1   | 1.2        |
| CCL3            | 1.6   | 3.8   | 8.3    | 35.3   | 4.3        |
| CCR5            | 11.9  | 12.5  | 110.7  | 3.4    | 1.6        |
| CXCL10          | 5.6   | 9.3   | 71.3   | 3.0    | 1.2        |
| CXCR3           | 2.2   | 3.7   | 11.8   | 3.1    | 1.1        |
| CCL22           | 7.2   | 7.7   | 13.3   | 5.5    | 2.8        |
| CCR4            | 7.2   | 9.2   | 7.4    | 2.2    | 4.9        |
| CCL2/ MCP-1     | 5.8   | 7.0   | 10.2   | 32.1   | 1.4        |
| CCL8/ MCP-2     | 18.7  | 48.5  | 189.3  | 0.5    | N.D.       |
| CCL7/ MCP-3     | 14.9  | 15.7  | 37.7   | 23.1   | 1.1        |
| CCL12/ MCP-5    | 41.9  | 31.1  | 191.4  | 4.2    | 1.4        |
| CCR3            | 11.8  | 10.2  | 136.5  | 2.9    | 3.4        |
| CCR6            | 5.5   | 7.6   | 57.3   | 1.1    | 5.1        |
| CCL19           | 4.2   | 7.2   | 8.5    | 5.5    | 1.3        |
| CX3CL1          | 0.9   | 1.0   | 4.1    | 5.8    | 1.5        |

\* Fold changes in the expression of chemokines/ chemokine receptors in suprarenal aorta from AngII, PAM3 or PAM3+AngII treated ApoE<sup>-/-</sup> mice were determined compared with levels in the corresponding region of vehicle treated ApoE<sup>-/-</sup> mice. N.D. denotes not detectable.

# Supplemental Figure1

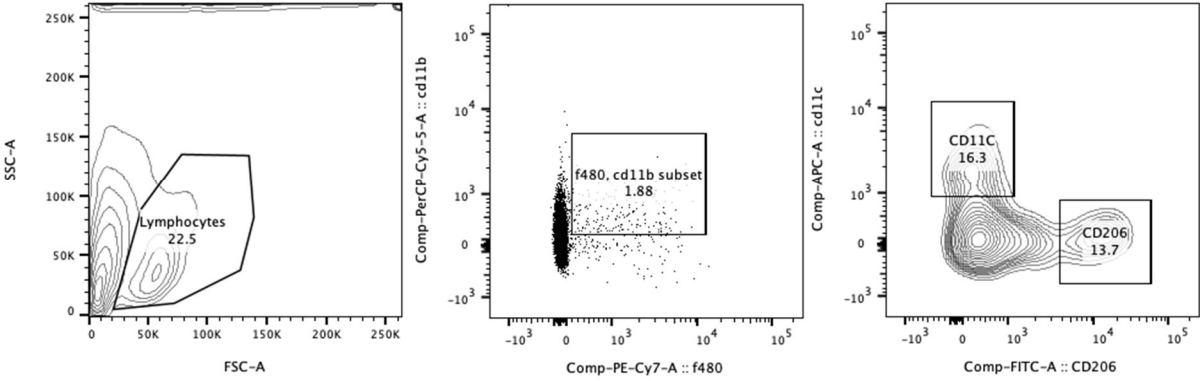

**Figure. S1.** The picture of the gating strategy used. First forward and side scatter were gated to isolate lymphocytes. Then lineage positive cells were excluded and CD11b+F4/80+ were identified. Expression of CD206 and CD11c were identified in this population.

## Supplemental Figure 2

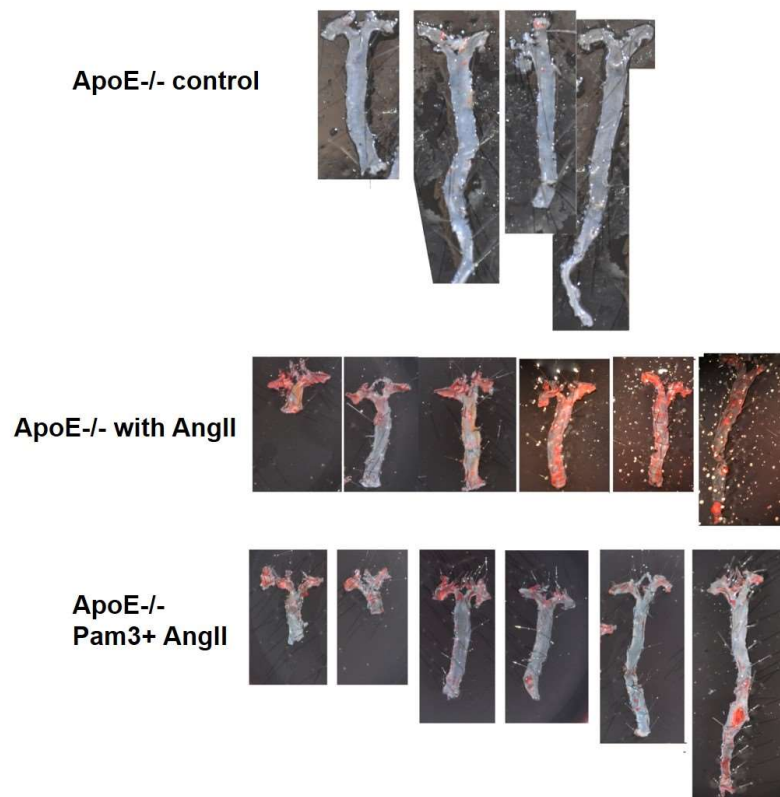

**Figure. S2.** The treatment of Pam3CSK4 does not increase atherosclerosis in AngII treated ApoE<sup>-/-</sup> mice.
